# Supplementary material
Source: publisher figshare collection journal article supplement (https://frontiersin.figshare.com/ndownloader/files/13214222)
Supplement: Supplementary file 1 [file 13214222]

Supplementary Table 1(a) Sampling locations-wise sample size of Mecopoda individuals belonging to five song type population (C=Chirper, DC=Double Chirper, 2P=Two Part, H=Helicopter, T=Train) in south Indian state of Karnataka for geometric morphometric analysis.

| Location | GPS Location | Song Types | | | | | Total |
| --- | --- | --- | --- | --- | --- | --- | --- |
| C | DC | 2P | H | T |
| Kadari Field Station | N13° 13’, E75° 05’ | 0 | 30 | 30 | 20 | 2 | 82 |
| Gerusoppa | N14° 14’, E74° 44’ | 0 | 0 | 0 | 1 | 0 | 1 |
| Sagar | N14° 10’, E75° 02’ | 0 | 0 | 0 | 0 | 1 | 1 |
| Shimoga | N13° 55’, E75° 35’ | 3 | 0 | 0 | 0 | 1 | 4 |
| Ullodu | N13° 38’, E77° 42’ | 9 | 0 | 0 | 0 | 15 | 24 |
| Institute of Science Campus | N13° 01’, E77° 34’ | 18 | 0 | 0 | 0 | 0 | 18 |
| Total | NA | 30 | 30 | 30 | 21 | 19 | 130 |

Supplementary Table 1(b) Distance between sampling locations of Mecopoda individual in south Indian state of Karnataka used in geometric morphometric analysis.

| Location | Institute of Science Campus | Kadari Field Station | Shimoga | Ullodu | Gerusoppa | Sagar |
| --- | --- | --- | --- | --- | --- | --- |
| Institute of Science Campus | 0 km | - | - | - | - | - |
| Kadari Field Station | 270 km | 0 km | - | - | - | - |
| Shimoga | 237 km | 95 km | 0 km | - | - | - |
| Ullodu | 70 km | 287 km | 231 km | 0 km | - | - |
| Gerusoppa | 335 km | 119 km | 98 km | 326 km | 0 km | - |
| Sagar | 302 km | 107 km | 65 km | 294 km | 33 km | 0 km |
